# Supplementary material for: Influence of bridge structure manipulation on the electrochemical performance of π-conjugated molecule-bridged silicon quantum dot nanocomposite anode materials for lithium-ion batteries
Source: Royal Society of Chemistry journal article supplement (doi:10.1039/d3na00132f), 2023-01-01
Supplement: d3na00132f1.pdf [file d3na00132f1.pdf]

## **Supplementary Information**

### **Influence of Bridge Structure Manipulation on the Electrochemical Performance of $\pi$ -Conjugated Molecule-Bridged Silicon Quantum Dot Nanocomposite Anode Materials for Lithium-Ion Batteries**

Young-Hwa Choi,<sup>†</sup> Jiyoung Bang,<sup>†</sup> Sunyoung Lee,<sup>‡</sup> and Hyun-Dam Jeong<sup>\*,†,‡</sup>

*<sup>†</sup>Department of Chemistry, Chonnam National University, Gwangju, 61186, Republic of  
Korea*

*<sup>‡</sup>QURES Co., Ltd., Gwangju, 61186, Republic of Korea*

## [Supplementary information 1]

### Synthesis of SiO<sub>2</sub> NPs and Si NCs@SiO<sub>x</sub>

**Materials.** All the chemical reagents were used as received without further purification. Tetraethylorthosilicate (TEOS)(Si(OC<sub>2</sub>H<sub>5</sub>)<sub>4</sub>, ≥99.0%), and sodium chloride (NaCl)(≥98.0%) were purchased from Sigma-Aldrich. Ethanol (EtOH)(C<sub>2</sub>H<sub>5</sub>OH, 99.5%), methanol (MeOH)(CH<sub>3</sub>OH, 99.5%), toluene (99.5%), and acetone were purchased from Dae-Jung (South Korea). Hydrochloric acid (HCl, 35.0~37.0%) and ammonium hydroxide solution (NH<sub>4</sub>OH, 25%) were purchased from Duksan (South Korea) and Acros Organic, respectively. Magnesium powder was obtained from Hana AMT (South Korea).

**Synthesis of Silica Nanoparticles and Oxide coated Silicon Nanocrystals.** Silica nanoparticles (SiO<sub>2</sub> NPs) and oxide coated silicon nanocrystals (Si NCs@SiO<sub>x</sub>) were synthesized by following a literature and our previous report, respectively.<sup>1,2</sup> Briefly, TEOS (0.05 mol) was dissolved in mixture solvent of MeOH (37.5 mL) and toluene (12.5 mL), and then an aqueous mixture containing an ammonium solution (0.8 mL) and distilled water (2.1 mL) was added to initiate the sol-gel reaction. The mixture was stirred for 12 h at room temperature. After the reaction had been completed, whitish precipitates were formed and collected by centrifugation at 12000 rpm for 10 min. The

synthesized SiO<sub>2</sub> NPs were washed three times with ethanol, distilled water, and acetone and then dried at 70 °C in oven. Si NCs@SiO<sub>x</sub> was synthesized by magnesiothermic reduction of silica nanoparticles. The SiO<sub>2</sub> NPs (1 g), NaCl (10 g), and magnesium powder (0.9 g) were ground manually to give a grayish colored powder, and then heated at 670 °C for 15 hours under an argon atmosphere in vacuum furnace. The resulting dark brown-colored powder product was washed with distilled water to remove NaCl and treated with hydrochloric acid for 6 hours to remove remaining magnesium (Mg) powder, magnesium silicide (Mg<sub>2</sub>Si), and magnesium oxide (MgO). Brown precipitates were collected by centrifugation at 12000 rpm for 10 min and washed with distilled water until the washings resulted in a neutral pH (ca. 7). Finally, the Si NC@SiO<sub>2</sub> was obtained after drying at 70 °C.

[Supplementary information 2]

## Size Distributions of Si QDs in SQNCs and High-Resolution TEM

### Images of SQNCs

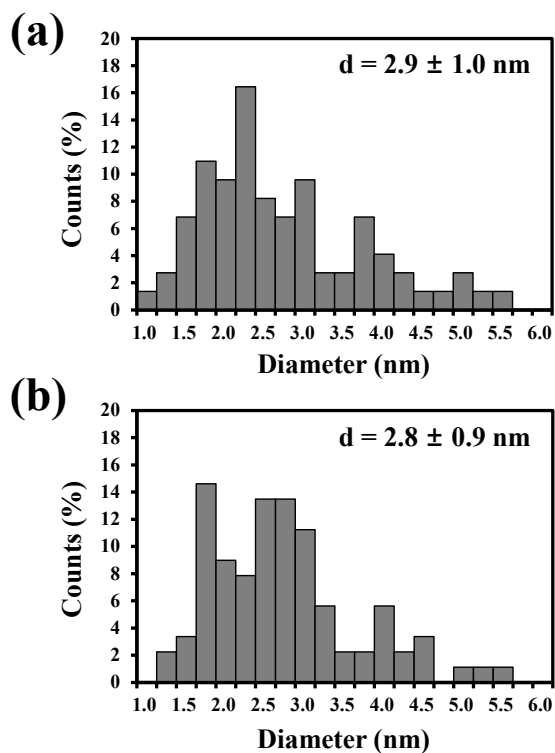

**Figure S1.** Count distributions of the Si QDs in (a) SQNC-VPEPV and (b) SQNC-VPV.

**Figure S2.** High-resolution TEM images of (a) SQNC-VPEPV and (b) SQNC-VPV.

[Supplementary information 3]

### Voltage Profiles Acquired from GITT Measurements of SQNCs

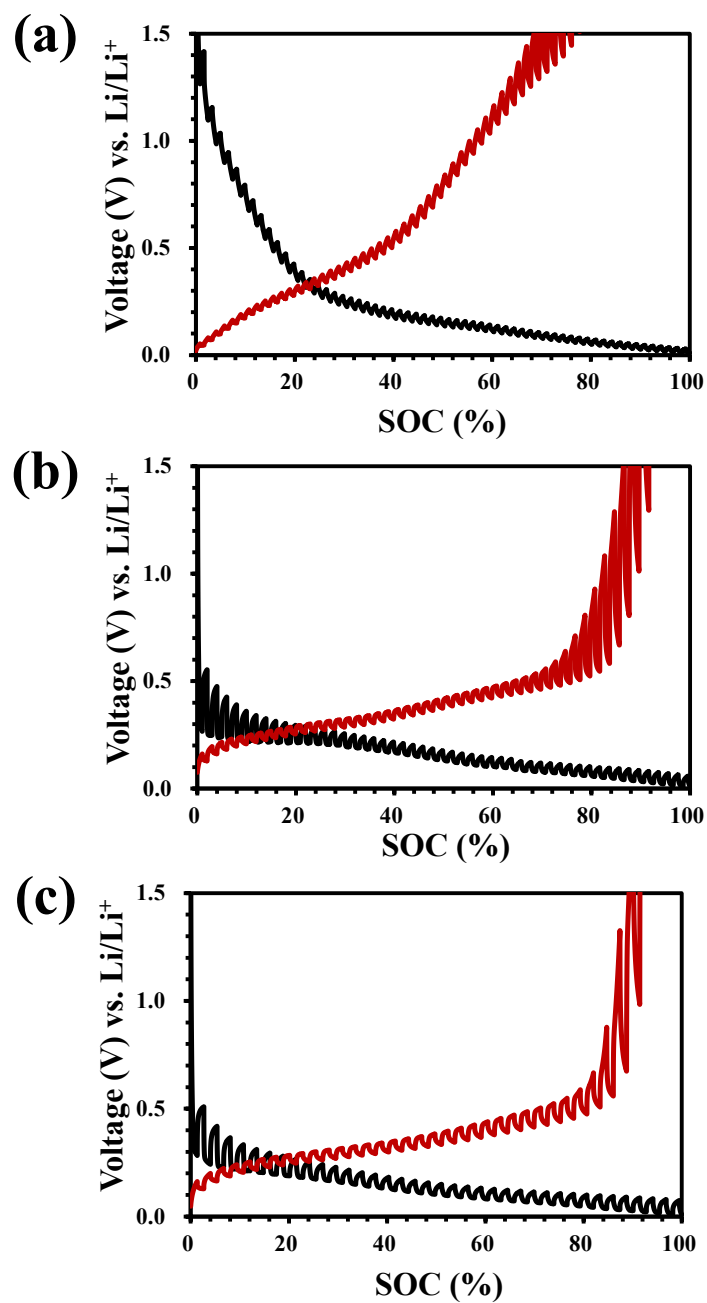

**Figure S3.** Voltage profiles of (a) SQNC-VPEPEPV, (b) SQNC-VPEPV, and (c)

SQNC-VPV in GITT measurements.

[Supplementary information 4]

## Calculation of Electronic Coupling and Electron Transfer Rate between Si QDs in Si QD Dimer

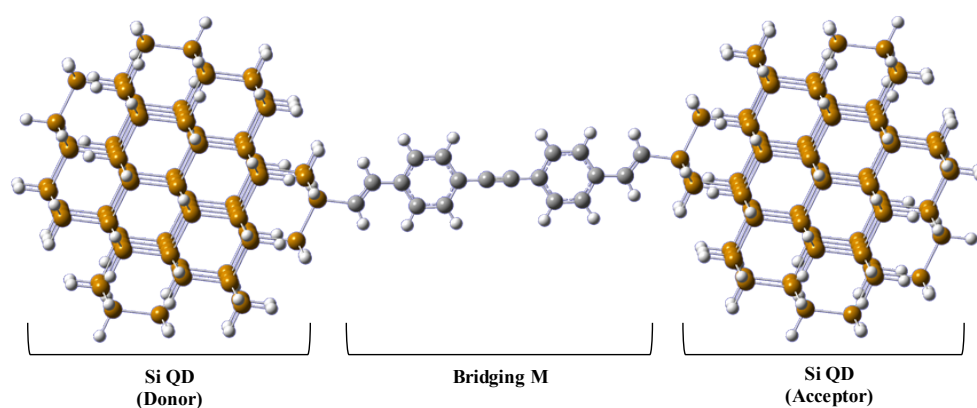

**Figure S4.** Structure of the molecule-bridged Si QD dimer.

**Method.** Through-bond electronic coupling represents the probability amplitude for electron transfer from a donor (D) to an acceptor (A) through a bridge (B).<sup>3,4</sup> Let us consider a D–B–A system to calculate the through-bond electronic coupling between D and A (Figure S4). The first step is to perform a Löwdin's symmetric orthogonalization of the Fock matrix (**F**) for the entire system.<sup>5,6</sup> The orthogonalized **F** matrix ( $F'$ ) is expressed as:

$$F' = S^{-1/2}FS^{-1/2} \quad (1)$$

where  $S$  is the overlap matrix of the entire system in the atomic orbital basis.

We partition this matrix into sub-blocks for the D, B, A, and interaction parts as:

$$F' = \begin{pmatrix} F'_D & F'_{DB} & F'_{DA} \\ F'_{BD} & F'_B & F'_{BA} \\ F'_{AD} & F'_{AB} & F'_A \end{pmatrix} \quad (2)$$

The sub-blocks for the D, B, and A parts are then diagonalized to obtain the eigenvalue

and eigenvector matrices, denoted by  $\varepsilon'$  and  $C'$ , respectively:

$$\varepsilon'_{D/B/A} = \begin{bmatrix} \varepsilon_1^{D/B/A} & & & & 0 \\ & \ddots & & & \\ & & \varepsilon_{HOMO}^{D/B/A} & & 0 \\ 0 & & & \varepsilon_{LUMO}^{D/B/A} & \\ & 0 & & & \ddots \\ 0 & & & & & \varepsilon_n^{D/B/A} \end{bmatrix} \quad (3)$$

$$C'_{D/B/A} = [u_{\varepsilon_1}^{D/B/A} \dots u_{\varepsilon_{HOMO}}^{D/B/A} u_{\varepsilon_{LUMO}}^{D/B/A} \dots u_{\varepsilon_n}^{D/B/A}] \quad (4)$$

The eigenvector  $u_n$  in  $C'$  corresponds to the eigenvalue  $\varepsilon_n$  in  $\varepsilon'$ . The retarded Green's function for B evaluated at energy  $E$  is given by:<sup>7</sup>

$$G_B^R(E) = C'_B (EI_B - \varepsilon'_B)^{-1} C_B^\dagger \quad (5)$$

The through-bond electronic coupling is calculated by:

$$T_{DBA} = u_{\varepsilon_{LUMO}}^{D\dagger} F'_{DB} G_B^R(E_t) F'_{BA} u_{\varepsilon_{LUMO}}^A \quad (6)$$

where  $E_t$  is the tunneling energy of an electron transferred from  $\varepsilon_{LUMO}$  of D to  $\varepsilon_{LUMO}$  of A, and subscript *LUMO* represents least unoccupied molecular orbital.

The through-space electronic coupling results from the contribution of the direct orbital overlapping between D and A to the electronic coupling.<sup>4</sup> Let us consider an isolated D/A system, which is formed by removing B from the D–B–A system, and the

open vacancies are capped with H atoms. The orthogonalized  $F$  matrix ( $F'$ ) of the isolated D/A system can be partitioned into sub-blocks for the D, A, and interaction parts as follows:

$$F' = \begin{pmatrix} F'_{D} & F'_{DA} \\ F'_{AD} & F'_{A} \end{pmatrix} \quad (7)$$

The through-space electronic coupling is calculated by:

$$T_{D-A} = u_{\varepsilon_{LUMO}}^{D\dagger} F' u_{\varepsilon_{LUMO}}^A \quad (8)$$

where  $u_{\varepsilon_{LUMO}}^D$  and  $u_{\varepsilon_{LUMO}}^A$  are the eigenvectors corresponding to the LUMO eigenstates for D and A, respectively.

The through-bond and through-space electronic couplings were calculated using an in-house MATLAB program, which implemented the above formalism developed with MATAB R2018b.<sup>8</sup> The  $F$  and  $S$  matrices, used as the inputs of the MATLAB program, were calculated using the Gaussian 16W program package.<sup>9</sup> Quantum mechanical calculations, including geometry optimization, were carried out for the D–B–A systems using the density functional theory (DFT) with the standard 6-31G(d,p) basis set.<sup>10-13</sup> Becke's three parameter hybrid functional, combined with the Lee–Yang–Parr correlation functional (B3-LYP), was used for all the calculations.<sup>14-16</sup> The Cartesian coordinates for the 1 nm Si QD and the D–B–A models used for the calculations are shown in Electronic Supplementary Information (ESI).



**The influence of bridge structure manipulation on inter-QD electron transfer rate in Si QD dimer.** The inter-QD electron transfer rate causes differences between the electronic conductivities of the SQNCs. This electron transfer rate is influenced by the molecular structure bridging the Si QDs and the surface environment of the Si QDs. To investigate the influence of bridge structure manipulation on the inter-QD electron transfer rate in the SQNCs, we calculated the rate of electron transfer between the QDs in a Si QD (1 nm, -Si<sub>35</sub>H<sub>35</sub>) dimer (SQD) bridged by a molecule identical to the SQNC. Figure S5(a) shows the structures of the VPEPEPV, VPEPV, and VPV molecule-bridged SQDs (NOTE: These model systems used to investigate the influence of bridge structure manipulation on inter-QD electron transfer rate in the SQNCs do not reflect the actual properties of synthesized SQNCs. This is because the surface environment of Si QDs does not match reality.). According to the Marcus theory, the rate constant of electron transfer in the nonadiabatic regime is represented using Fermi's golden rule expression in the high-temperature classical limit.<sup>17,18</sup>

$$W = \frac{2\pi}{\hbar} V^2 \left( \frac{1}{4\pi\lambda k_B T} \right)^{1/2} \exp\left( -\frac{(\Delta G_0 + \lambda)^2}{4\lambda k_B T} \right) \quad (9)$$

where  $V$  is the electronic coupling,  $\lambda$  is the reorganization energy,  $\Delta G_0$  is the free-energy difference between the two electronic origins,  $k_B$  is the Boltzmann constant, and  $T$  is the

absolute temperature, as depicted in the model for the energetics of the electron transfer reaction in Figure S6.<sup>19</sup>

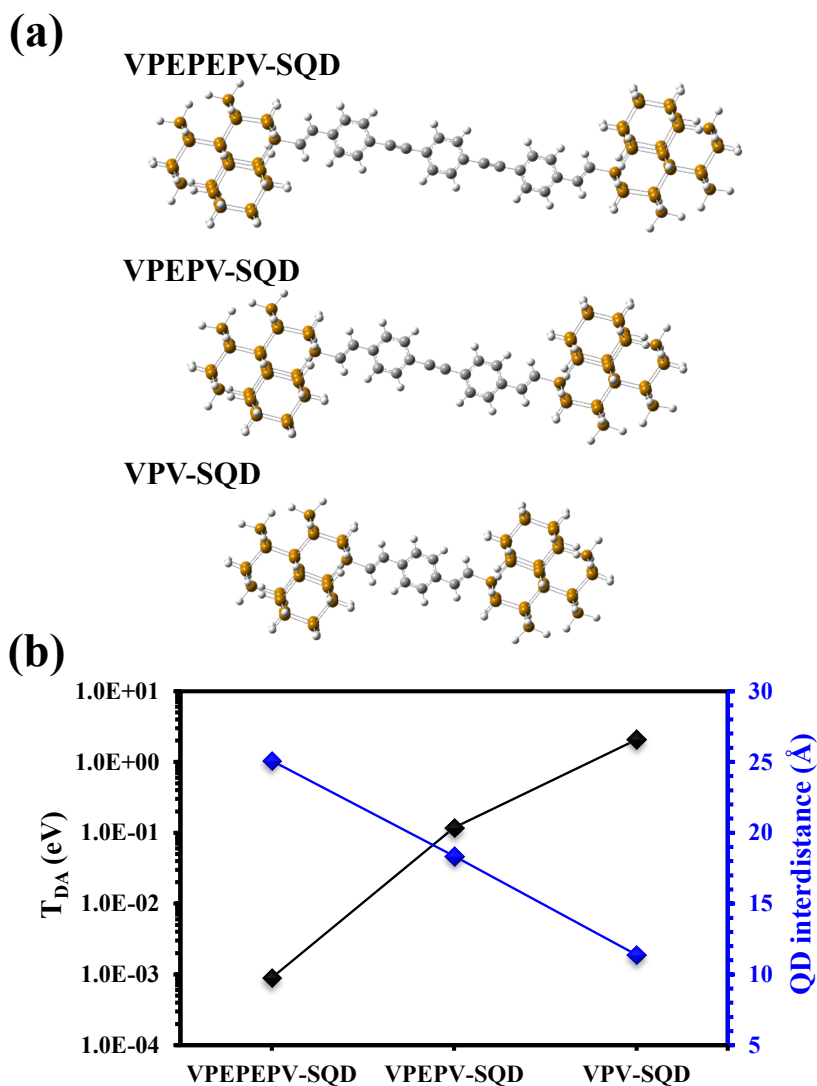

**Figure S5.** (a) Structures of the VPEPEPV, VPEPV, and VPV molecule-bridged Si QD (1 nm,  $-\text{Si}_{35}\text{H}_{35}$ ) dimers, and (b) through-bond electronic coupling between the Si QDs as a function of the QD interdistance in the VPEPEPV, VPEPV, and VPV molecule-bridged Si QD dimers.

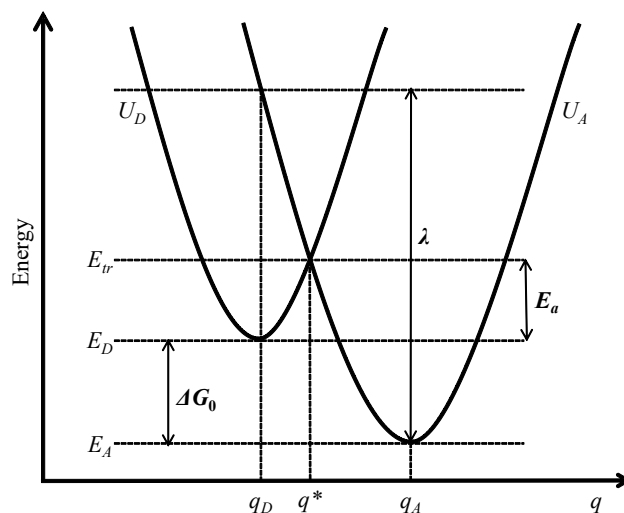

**Figure S6.** Model for the energetics of the electron transfer reaction; two potential surfaces ( $U_D$  and  $U_A$ ) are associated with donor (with  $E_D$ ) and acceptor (with  $E_A$ ) electronic states; “ $q$ ” stands for the nuclear configuration in normal modes.<sup>19</sup>

Reorganization energy and electronic coupling are the key parameters that govern the electron transfer rate. The reorganization energy of the Si QD used as D/A was calculated using the method demonstrated in our previous report.<sup>19</sup> The electronic coupling, which represents the probability amplitude for the transfer of an electron through the specified orbital space, in the D–B–A system is given by the sum of the through-space ( $|T_{D-A}|$ ) and through-bond ( $|T_{DBA}|$ ) contributions.<sup>20</sup> The calculated electronic couplings and bridge-mediated inter-QD electron transfer rates for the SQDs

are presented in Table S1, along with the QD interdistances. For all the SQDs, the through-space electronic couplings are zero, which is anticipated because the through-space overlap is extremely small due to the relatively long distance between the Si QDs. In contrast, the through-bond electronic couplings range from 10 to  $10^{-4}$  eV, indicating that the Si QDs covalently bridged with the  $\pi$ -conjugated molecule group significantly strengthens the coupling.<sup>21,22</sup> Therefore, it can be concluded that electronic coupling between the Si QDs in the SQDs occurs through the bonds of the organic linkers, and the through-space coupling is of negligible importance. Furthermore, the electronic coupling is significantly modulated by the nature of the bridging molecule. As shown in Figure S5(b), the coupling between the Si QDs strengthens as the length of the bridging molecule decreases.

**Table S1.** Distance, through-space electronic coupling ( $|T_{D-A}|$ ), through-bond electronic coupling ( $|T_{DBA}|$ ), and electron transfer rate between the Si QDs (1 nm, - Si<sub>35</sub>H<sub>35</sub>) in the VPEPEPV, VPEPV, and VPV molecule-bridged Si QD dimers.

|         | QD inter-<br>distance<br>(Å) | Electronic coupling (eV) |             |            | Reorganization energy (eV) |             |                   | Electron<br>transfer rate<br>at 293.15 K<br>(s <sup>-1</sup> ) |
|---------|------------------------------|--------------------------|-------------|------------|----------------------------|-------------|-------------------|----------------------------------------------------------------|
|         |                              | $ T_{D-A} $              | $ T_{DBA} $ | $ T_{DA} $ | $\lambda_N$                | $\lambda_C$ | $\lambda_{total}$ |                                                                |
| VPEPEPV | 25.1                         | 0.00E+00                 | 8.94E-04    | 8.94E-04   | 1.13E-01                   | 1.11E-01    | 2.24E-01          | 3.14E+09                                                       |

---

|       |      |          |          |          |          |
|-------|------|----------|----------|----------|----------|
| -SQD  |      |          |          |          |          |
| VPEPV | 18.4 | 0.00E+00 | 1.18E-01 | 1.18E-01 | 5.46E+13 |
| -SQD  |      |          |          |          |          |
| VPV   | 11.4 | 0.00E+00 | 2.07E+00 | 2.07E+00 | 1.68E+16 |
| -SQD  |      |          |          |          |          |

**[Supplementary information 5]**

## **Electron Transmission Calculation in a Molecule-Bridged Si QD**

## Dimer System with Excess Electrons Injected into the Left Si QD

To estimate the electronic conductivity as a function of the current density applied during the cell operation, we established a novel approach to calculate the electron transmission through the molecular bridge in a constant-current mode, based on the nonequilibrium Green's function (NEGF) coupled with the Gaussian broadening of discrete states (Figure S7(b)). Here, we term the calculation method based on this approach as a “*constant-current mode transmission calculation method*”. This novel approach was developed based on the hypothesis that the number of electrons accumulated in the Si QDs of the SQNC during the cell operation depends on the applied constant current density, and was realized for a QD dimer system, in which the left QD was injected with excess electrons. In addition, the QD dimer system keeps the applied voltage at zero in constant current mode except for the excess electrons injected into the left Si QD.

**Method.** We calculated the electron transmission from the left Si QD (L) to the right Si QD (R) through the bridge (B) in the L-B-R system, in which excess electrons were injected into L. As evident from Equation 2, the sub-blocks of the orthogonalized Fock matrices for the SQDs are used for this calculation. The retarded (advanced) Green's function of the bridge can be expressed as:

$$G^{R(A)}(E) = [EI_B - F_B' - \Sigma_L^{R/A} - \Sigma_R^{R/A}]^{-1} \quad (10)$$

where  $I_B$  and  $F_B'$  are the unit and orthogonalized Fock matrices for the bridge, respectively;  $\Sigma_{L/R}$  is the self-energy matrix that accounts for the effect of the Si QD on the bridge, which can also be represented as the linewidth function matrix ( $\Gamma_{L/R}$ ).<sup>25</sup> The self-energy and linewidth function matrices are:<sup>5</sup>

$$\Sigma_{L/R}^{R/A}(E) = \tau_{L/R}^+ g_{L/R}^{R/A} \tau_{L/R} \quad (11)$$

$$\Gamma_{L/R}(E) = i[\Sigma_{L/R}^R - \Sigma_{L/R}^A] \quad (12)$$

where  $g_{L/R}$  is the Green's function of the left/right Si QD and can be calculated using the density of states (DOS) obtained by the Gaussian broadening of discrete states, proposed by Tada *et al.*;<sup>5</sup>  $\tau_L$  and  $\tau_R$  are  $F_{DB}'$  and  $F_{AB}'$  in Equation 2, respectively.

In general, the electric current flow is given by the Landauer–Büttiker formula:<sup>5,24,25</sup>

$$I = \frac{2e}{h} \int_{-\infty}^{\infty} dE T r \left[ \Gamma_L \left( E - \frac{eV_b}{2} \right) G^R(E, V_b) \times \Gamma_R \left( E + \frac{eV_b}{2} \right) G^A(E, V_b) \right] [f(E - \mu_L) - f(E - \mu_R)] \quad (13)$$

where  $h$  is the Planck constant;  $e$  denotes the electron charge;  $V_b$  is an applied bias voltage;  $f$  is the Fermi-distribution function for the electrode;  $\mu_{L/R}$  is electrochemical potential of the L/R electrode.

In Equation 13, the current is zero at equilibrium (zero-biased condition) since  $\mu_L = \mu_R$ . It is worth noting that the electrochemical potentials of the lithium ions, which maintain equilibrium across all phases (anode, cathode, and electrolyte) of the LIBs, are constant,

thereby determining the Fermi levels of the electrode materials. Therefore, the Fermi levels of the Si QDs in the SQNC electrodes separated from the conducting polymer by the organic molecules will be the same, indicating that it is difficult to apply Equation 13 to the SQNC systems. This is why we need to find a novel approach to estimate the electronic conductivity of the SQNCs. To estimate the electronic conductivity as a function of the constant current density applied during the cell operation, we set the electric current at a molecular junction as:

$$I = \frac{2e}{h} \int_{E_f}^{\infty} dE \text{Tr}[\Gamma_L(E)G^R(E) \times \Gamma_R(E)G^A(E)]f(E - E_{cut}) = \frac{2e}{h} T_{LIB}(E_{cut}) \quad (14)$$

where  $E_f$  is the Fermi level of the R;  $E_{cut}$  is the Fermi level of the L, when a certain number of electrons are injected into L;  $T_{LIB}(E_{cut})$  is the transmission of the electrons with energies from  $E_f$  to  $E_{cut}$ .  $E_{cut}$  can be calculated using the following expression:

$$n = \frac{1}{\pi} \int_{E_f}^{E_{cut}} dE D_L(E) \quad (15)$$

where  $n$  is the number of electrons injected into L and is proportional to the constant current density applied during cell operation;  $D_L(E)$  is the broadened DOS of the L.

**Electron transmission in a molecule-bridged SQD system with excess electrons injected into the left Si QD.** The values of  $E_{cut}$  as functions of  $n$  are displayed in Figure S8. The calculated  $T_{LIB}(E_{cut})$  values of VPEPEPV, VPEPV, and VPV-SQDs as



functions of  $n$  are shown in Figure S7(c) and Table S2. The  $T_{LIB}(E_{cut})$  value of VPEPV-SQD at 0.30 eV, corresponding to the energy when one electron is injected into L, is approximately five times higher than that of the other SQDs. It is interesting to note that the SQD with the highest  $T_{LIB}$  varies depending on  $n$ . When  $n$  is less than 12, the  $T_{LIB}$  values of VPEPV-SQD are higher than those of the other SQDs. However, when  $n$  is larger than 12, VPV-SQD exhibits the highest  $T_{LIB}$  values, among all the SQDs. This result indicates that the number of electrons accumulated in the anode-active material can be modulated depending on the applied current density. To understand, at the molecular level, why the SQD with the dominant  $T_{LIB}$  differed depending on the number of injected electrons into L, we analyzed the distribution of the DOS for L, B, and R in the vicinity of the Fermi level of L. Notably,  $T_{LIB}$  for the L-B-R system is mainly determined by the DOS of L, B, and R as well as the coupling strength between them. In addition, the transmission through B is greatly enhanced if the conduction electrons are injected at energies close to the DOS of B. Figure S7(d) shows the broadened DOS profiles of L, B, and R in the vicinity of the Fermi level of L. The DOS profiles of L and R for VPEPEPV, VPEPV, and VPV-SQDs are almost identical, suggesting that the difference between  $T_{LIB}$  of the SQDs is caused by the DOS of B and the coupling strength between B and L/R. Consequently, the  $n$ -dependent variations of the SQD with

the highest  $T_{LIB}$  might be greatly influenced by the difference in the distribution of DOS of the bridging molecules and the coupling strength between B and L/R.

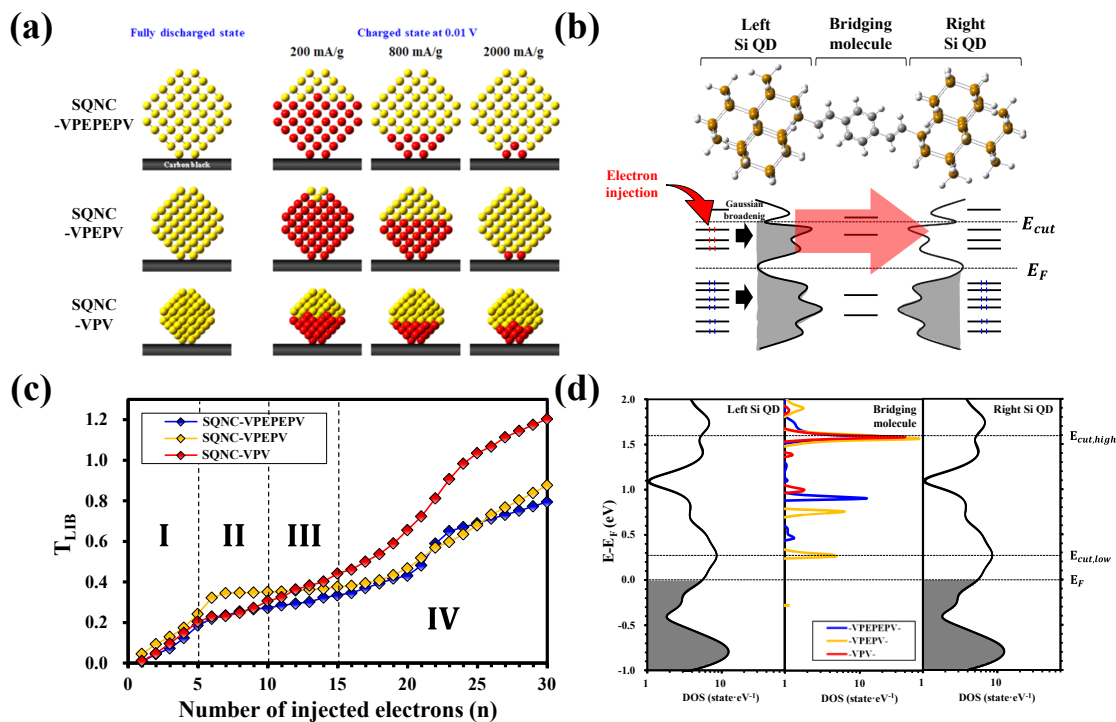

**Figure S7.** (a) Schematic representation of the rate capabilities of the SQNC-VPEPEPV, SQNC-VPEPV, and SQNC-VPV at various current densities. (b) Schematic representation of electron transmission with excess electrons injected into the left electrode and (c) calculated electron transmission probabilities for the VPEPEPV, VPEPV, and VPV molecule-bridged Si QD (1 nm,  $\text{Si}_{35}\text{H}_{35}$ ) dimers as functions of the number of electrons injected into left Si QD. (d) Broadened DOS profiles of the left Si QD, bridging molecule, and right Si QD for VPEPEPV, VPEPV, and VPV-SQDs in the

vicinity of the Fermi level of the Si QD.

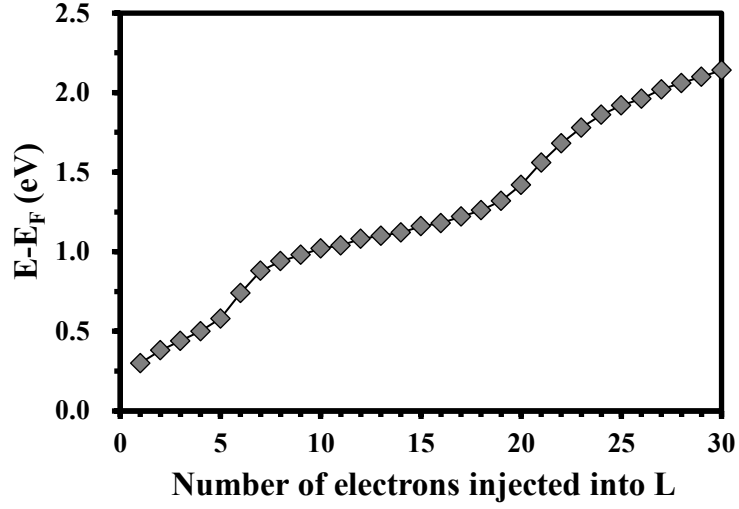

**Figure S8.** The values of  $E_{cut}$  in the vicinity of the Fermi level of the L as a function of the number of electrons injected into L.

**Table S2.** The values of  $T_{LIB}(E_{cut})$  for the VPEPEPV, VPEPV, and VPV-SQDs.

| $n$ | $E_{cut}$ (eV) | $T_{LIB}(E_{cut})$ (eV) |           |         |
|-----|----------------|-------------------------|-----------|---------|
|     |                | VPEPEPV-SQD             | VPEPV-SQD | VPV-SQD |
| 1   | 0.30           | 0.0073                  | 0.0457    | 0.0110  |
| 2   | 0.38           | 0.0445                  | 0.0937    | 0.0488  |
| 3   | 0.44           | 0.0728                  | 0.1294    | 0.0967  |
| 4   | 0.50           | 0.1238                  | 0.1748    | 0.1493  |

|    |      |        |        |        |
|----|------|--------|--------|--------|
| 5  | 0.58 | 0.186  | 0.2423 | 0.2047 |
| 6  | 0.74 | 0.2191 | 0.3228 | 0.2291 |
| 7  | 0.88 | 0.235  | 0.3452 | 0.2324 |
| 8  | 0.94 | 0.2547 | 0.3467 | 0.2476 |
| 9  | 0.98 | 0.2658 | 0.3482 | 0.2724 |
| 10 | 1.02 | 0.2716 | 0.3509 | 0.3066 |
| 11 | 1.04 | 0.2852 | 0.3528 | 0.3252 |
| 12 | 1.08 | 0.2933 | 0.3585 | 0.3634 |
| 13 | 1.10 | 0.3023 | 0.3622 | 0.3829 |
| 14 | 1.12 | 0.3229 | 0.3665 | 0.4024 |
| 15 | 1.16 | 0.3342 | 0.3761 | 0.4418 |
| 16 | 1.18 | 0.3461 | 0.3815 | 0.4615 |
| 17 | 1.22 | 0.3703 | 0.3938 | 0.5004 |
| 18 | 1.26 | 0.393  | 0.4086 | 0.5377 |
| 19 | 1.32 | 0.4172 | 0.4339 | 0.5902 |
| 20 | 1.42 | 0.4311 | 0.4675 | 0.6562 |
| 21 | 1.56 | 0.4821 | 0.5187 | 0.7234 |
| 22 | 1.68 | 0.5893 | 0.5697 | 0.8128 |

|    |      |        |        |        |
|----|------|--------|--------|--------|
| 23 | 1.78 | 0.6507 | 0.5973 | 0.9073 |
| 24 | 1.86 | 0.6701 | 0.6356 | 0.9832 |
| 25 | 1.92 | 0.6887 | 0.6792 | 1.0357 |
| 26 | 1.96 | 0.7123 | 0.7317 | 1.0677 |
| 27 | 2.02 | 0.7311 | 0.7671 | 1.1138 |
| 28 | 2.06 | 0.7517 | 0.8027 | 1.1444 |
| 29 | 2.10 | 0.7731 | 0.8392 | 1.1748 |
| 30 | 2.14 | 0.7948 | 0.8765 | 1.2038 |

## References

- S1. D. H. Lee, S. W. Han and D. P. Kang, *J. Sol-Gel Sci. Technol.*, 2015, **74**, 78-83.
- S2. D. -S. Lee, Y. -H. Choi and H.-D. Jeong, *J. Ind, Eng, Chem.*, 2017, **53**, 82-92.
- S3. A. Biancardi, S. C. Martin, C. Liss and M. Caricato, *J. Chem. Theory Comput.*, 2017, **13**, 4154–4161.
- S4. R. Hoffmann, *Acc. Chem. Res.*, 1971, **4**, 1–9.
- S5. T. Tada, M. Kondo and K. Yoshizawa, *J. Chem. Phys.*, 2004, **121**, 8050–8057.
- S6. P.-O. Löwdin, *J. Chem. Phys.*, 1950, **18**, 365–375.
- S7. J. Jortner and M. Bixon, *Electron Transfer—From Isolated Molecules to Biomolecules*, John Wiley & Sons, New York, 1999.

- S8. MATLAB version 9.5.0.1178774 (R2018b), The MathWorks, Inc., Natick MA, 2018.
- S9. Gaussian 16, Revision C.01, M. J. Frisch, G. W. Trucks, H. B. Schlegel, G. E. Scuseria, M. A. Robb, J. R. Cheeseman, G. Scalmani, V. Barone, G. A. Petersson, H. Nakatsuji, X. Li, M. Caricato, A. V. Marenich, J. Bloino, B. G. Janesko, R. Gomperts, B. Mennucci, H. P. Hratchian, J. V. Ortiz, A. F. Izmaylov, J. L. Sonnenberg, D. Williams-Young, F. Ding, F. Lipparini, F. Egidi, J. Goings, B. Peng, A. Petrone, T. Henderson, D. Ranasinghe, V. G. Zakrzewski, J. Gao, N. Rega, G. Zheng, W. Liang, M. Hada, M. Ehara, K. Toyota, R. Fukuda, J. Hasegawa, M. Ishida, T. Nakajima, Y. Honda, O. Kitao, H. Nakai, T. Vreven, K. Throssell, J. A. Montgomery, Jr., J. E. Peralta, F. Ogliaro, M. J. Bearpark, J. J. Heyd, E. N. Brothers, K. N. Kudin, V. N. Staroverov, T. A. Keith, R. Kobayashi, J. Normand, K. Raghavachari, A. P. Rendell, J. C. Burant, S. S. Iyengar, J. Tomasi, M. Cossi, J. M. Millam, M. Klene, C. Adamo, R. Cammi, J. W. Ochterski, R. L. Martin, K. Morokuma, O. Farkas, J. B. Foresman, and D. J. Fox, Gaussian, Inc., Wallingford CT, 2016.
- S10. P. Hohenberg and W. Kohn, *Phys. Rev.*, 1964, **136**, B864.
- S11. W. Kohn and L. J. Sham, *Phys. Rev.*, 1965, **140**, A1133.
- S12. G. A. Petersson, A. Bennett, T. G. Tensfeldt, M. A. Al-Laham, W. A. Shirley and J. Mantzaris, *J. Chem. Phys.*, 1988, **89**, 2193.
- S13. G. A. Petersson and M. A. Al-Laham, *J. Chem. Phys.*, 1991, **94**, 6081.
- S14. A. D. Becke, *J. Chem. Phys.*, 1993, **98**, 5648.
- S15. B. Miehlich, A. Savin, H. Stoll and H. Preuss, *Chem. Phys. Lett.*, 1989, **157**, 200–206.

- S16. C. Lee, W. Yang and R. G. Parr, *Phys. Rev. B*, 1988, **37**, 785–789.
- S17. R. A. Marcus and N. Sutin, *Angew. Chem. Int. Ed. Engl.*, 1993, **32**, 1111.
- S18. P. Siddarth and R. A. Marcus, *J. Phys. Chem.*, 1993, **97**, 2400.
- S19. Y.-H. Choi, H. Yun and H.-D. Jeong, *Bull. Korean. Chem. Soc.*, 2021, **42**, 435–445.
- S20. R. C. Quardokus, Y. Lu, N. A. Wasio, C. S. Lent, F. Justaud, C. Lapinte and S. A. Kandel, *J. Am. Chem. Soc.*, 2012, **134**, 1710–1714.
- S21. T.-H. Le, K.-J. Kim and H.-D. Jeong, *J. Phys. Chem. C*, 2017, **121**, 15957–15969.
- S22. T.-H. Le, Y.-H. Choi, K.-J. Kim and H.-D. Jeong, *ACS Omega*, 2019, **4**, 3133–3145.
- S23. M. Smeu and K. Leung, *Phys. Chem. Chem. Phys.*, 2021, **23**, 3214–3218.
- S24. J. C. Cuevas, A. L. Yeyati and A. Martin-Rodero, *Phys. Rev. Lett.*, 1998, **80**, 1066–1069.
- S25. S. Datta, *Quantum Transport: Atom to Transistor*, Cambridge University Press, Cambridge, 2005.
