# Supplementary material for: Influence of bridge structure manipulation on the electrochemical performance of π-conjugated molecule-bridged silicon quantum dot nanocomposite anode materials for lithium-ion batteries
Source: Royal Society of Chemistry journal article supplement (doi:10.1039/d3na00132f), 2023-01-01
Supplement: d3na00132f2.xlsx [file d3na00132f2.xlsx]

## Sheet: Sheet1
	1. Si QD (1nm, Si35H35)						2. SQD-VPEPEPV (Si35H35−CH=CH−C6H4−C≡C−C6H4−C=C−C6H4−CH=CH−Si35H35)							3. SQD-VPEPV (Si35H35−CH=CH−C6H4−C≡C−C6H4−CH=CH−Si35H35)							4. SQD-VPV (Si35H35−CH=CH−C6H4−C=C−Si35H35)
	No.	Atom	Cartesian coordinate (Å)				No.	Atom	Cartesian coordinate			Part		No.	Atom	Cartesian coordinate			Part		No.	Atom	Cartesian coordinate			Part
			X	Y	Z				X	Y	Z					X	Y	Z					X	Y	Z
	1	Si	0	0	0		1	Si	12.4722	-1.3651	0	Donor		1	Si	9.0061	-0.9454	-1.0486	Donor		1	Si	0.8563	5.6256	0	Donor
	2	Si	-1.3468	1.3468	1.3468		2	Si	13.7895	0.6167	0	↓		2	Si	10.3357	0.582	0.213	↓		2	Si	-0.9073	7.2233	0	↓
	3	Si	1.3468	-1.3468	1.3468		3	Si	13.0022	-2.6253	1.9423			3	Si	9.3799	-3.1359	-0.2119			3	Si	2.1807	5.9603	1.943
	4	Si	1.3468	1.3468	-1.3468		4	Si	13.0022	-2.6252	-1.9423			4	Si	9.6855	-0.8104	-3.3224			4	Si	2.1807	5.9603	-1.943
	5	Si	-1.3468	-1.3468	-1.3468		5	Si	16.1063	0.0572	0			5	Si	12.6459	0.0236	0.0139			5	Si	-0.0002	9.4298	0
	6	Si	-0.0167	2.7162	2.7162		6	Si	13.3172	1.8947	1.9482			6	Si	9.7246	0.4727	2.508			6	Si	-2.2439	6.9568	1.9486
	7	Si	2.7162	-0.0167	2.7162		7	Si	13.3172	1.8948	-1.9482			7	Si	10.0308	2.7944	-0.6037			7	Si	-2.2439	6.9568	-1.9486
	8	Si	-2.7162	0.0167	2.7162		8	Si	15.3014	-3.1995	1.9167			8	Si	11.674	-3.6817	-0.4524			8	Si	3.0986	8.1441	1.9174
	9	Si	0.0167	-2.7162	2.7162		9	Si	12.5039	-1.3782	3.8873			9	Si	8.7777	-3.2897	2.0705			9	Si	0.869	5.6551	3.8855
	10	Si	2.7162	2.7162	-0.0167		10	H	12.1907	-3.8826	1.9372			10	H	8.5729	-4.1154	-1.0047			10	H	3.2986	4.9655	1.9376
	11	Si	-2.7162	2.7162	0.0167		11	Si	15.3014	-3.1994	-1.9168			11	Si	11.973	-1.3962	-3.5141			11	Si	3.0986	8.1441	-1.9174
	12	Si	2.7162	-2.7162	0.0167		12	Si	12.504	-1.3781	-3.8873			12	Si	9.3455	1.3768	-4.1519			12	Si	0.869	5.6551	-3.8855
	13	Si	-2.7162	-2.7162	-0.0167		13	H	12.1908	-3.8825	-1.9373			13	H	8.8722	-1.7768	-4.1232			13	H	3.2986	4.9655	-1.9376
	14	Si	0.0167	2.7162	-2.7162		14	Si	16.6151	-1.2196	1.9474			14	Si	12.9973	-2.1858	0.8346			14	Si	1.3405	9.7413	1.9468
	15	Si	2.7162	0.0167	-2.7162		15	Si	16.6151	-1.2196	-1.9475			15	Si	13.2991	0.1364	-2.2759			15	Si	1.3405	9.7413	-1.9468
	16	Si	-2.7162	-0.0167	-2.7162		16	Si	17.4061	2.0567	0			16	Si	13.9579	1.5564	1.2847			16	Si	-1.7759	11.0216	0
	17	Si	-0.0167	-2.7162	-2.7162		17	Si	13.7888	0.6054	3.8791			17	Si	10.0482	-1.7325	3.3121			17	Si	-0.8955	7.227	3.8783
	18	Si	1.364	1.364	4.0712		18	Si	14.5867	3.8947	1.9264			18	Si	11.0101	2.0195	3.7601			18	Si	-4.0246	8.5186	1.926
	19	Si	-1.364	-1.364	4.0712		19	H	11.8625	2.2446	1.938			19	H	8.2793	0.8329	2.6318			19	H	-2.8142	5.5735	1.9409
	20	Si	1.364	4.0712	1.364		20	Si	13.7888	0.6055	-3.8791			20	Si	10.645	2.8944	-2.8902			20	Si	-0.8955	7.227	-3.8783
	21	Si	4.0712	1.364	1.364		21	Si	14.5867	3.8948	-1.9263			21	Si	11.3063	4.3191	0.6846			21	Si	-4.0246	8.5186	-1.926
	22	Si	-4.0712	-1.364	1.364		22	H	11.8625	2.2446	-1.938			22	H	8.5817	3.1464	-0.4771			22	H	-2.8142	5.5735	-1.9409
	23	Si	-1.364	-4.0712	1.364		23	Si	15.8396	-4.4823	-0.0001			23	Si	12.3482	-3.5956	-2.7213			23	Si	4.4482	8.4792	0
	24	Si	-1.364	4.0712	-1.364		24	H	15.6216	-3.9923	3.1437			24	H	11.887	-5.0663	0.0705			24	H	3.9309	8.3414	3.1441
	25	Si	-4.0712	1.364	-1.364		25	H	11.0512	-1.0464	3.935			25	H	7.3197	-3.0342	2.2509			25	H	0.3195	4.2698	3.9289
	26	Si	4.0712	-1.364	-1.364		26	H	12.8247	-2.1801	5.1037			26	H	9.0537	-4.6692	2.5675			26	H	1.7082	5.8468	5.104
	27	Si	1.364	-4.0712	-1.364		27	H	15.6216	-3.9922	-3.1438			27	H	12.3806	-1.3168	-4.9508			27	H	3.9309	8.3414	-3.1441
	28	Si	-1.364	1.364	-4.0712		28	H	12.8247	-2.18	-5.1038			28	H	9.7299	1.4484	-5.5913			28	H	1.7082	5.8468	-5.104
	29	Si	1.364	-1.364	-4.0712		29	H	11.0512	-1.0463	-3.9351			29	H	7.9028	1.7461	-4.0543			29	H	0.3195	4.2698	-3.9289
	30	Si	0	0	5.4526		30	Si	18.9283	-1.7628	1.9201			30	Si	15.3011	-2.7275	0.6191			30	Si	2.2294	11.9451	1.9194
	31	Si	0	5.4526	0		31	Si	16.099	0.0806	3.8686			31	Si	12.3487	-2.264	3.1199			31	Si	-0.0242	9.4302	3.8678
	32	Si	5.4526	0	0		32	Si	18.9283	-1.7627	-1.9201			32	Si	15.5991	-0.436	-2.4471			32	Si	2.2294	11.9451	-1.9194
	33	Si	-5.4526	0	0		33	Si	16.0991	0.0807	-3.8686			33	Si	12.9438	2.3501	-3.0634			33	Si	-0.0242	9.4302	-3.8678
	34	Si	0	-5.4526	0		34	Si	19.7089	1.4685	0			34	Si	16.2497	0.9655	1.0657			34	Si	-0.8443	13.2083	0
	35	Si	0	0	-5.4526		35	Si	16.8827	3.3118	1.9489			35	Si	13.2953	1.4271	3.563			35	Si	-3.0973	10.6983	1.9485
	36	H	-0.8885	3.5772	3.5772		36	Si	16.8827	3.3119	-1.9488			36	Si	13.5943	3.7511	0.4499			36	Si	-3.0973	10.6983	-1.9485
	37	H	3.5772	-0.8885	3.5772		37	H	13.4805	1.4195	5.0947			37	H	9.6547	-1.7922	4.7533			37	H	-1.7457	7.0463	5.095
	38	H	-3.5772	0.8885	3.5772		38	Si	14.0795	5.1661	0.0001			38	Si	10.6616	4.214	2.9557			38	Si	-5.3595	8.213	0
	39	H	0.8885	-3.5772	3.5772		39	H	14.2715	4.6877	3.1541			39	H	10.6084	1.939	5.198			39	H	-4.8561	8.3281	3.1539
	40	H	3.5772	3.5772	-0.8885		40	H	13.4805	1.4197	-5.0947			40	H	10.4331	4.2872	-3.3912			40	H	-1.7457	7.0463	-5.095
	41	H	-3.5772	3.5772	0.8885		41	H	14.2715	4.6878	-3.154			41	H	11.0893	5.7015	0.1579			41	H	-4.8561	8.3281	-3.1539
	42	H	3.5772	-3.5772	0.8885		42	Si	18.1349	-5.044	-0.0001			42	Si	14.6319	-4.1687	-2.9233			42	Si	5.3533	10.6619	0
	43	H	-3.5772	-3.5772	-0.8885		43	H	15.0131	-5.7285	-0.0001			43	H	11.5137	-4.5503	-3.5135			43	H	5.5534	7.4721	0
	44	H	0.8885	3.5772	-3.5772		44	Si	19.4196	-3.0604	0			44	Si	15.9294	-2.6473	-1.6637			44	Si	3.5883	12.2329	0
	45	H	3.5772	0.8885	-3.5772		45	Si	20.2147	0.2266	1.9531			45	Si	16.5962	-1.2207	1.9095			45	Si	0.4604	13.5202	1.9527
	46	H	-3.5772	-0.8885	-3.5772		46	H	19.2355	-2.5646	3.1443			46	H	15.5061	-4.1159	1.1352			46	H	3.068	12.1251	3.1444
	47	H	-0.8885	-3.5772	-3.5772		47	Si	17.42	2.0474	3.879			47	Si	13.6791	-0.763	4.3799			47	Si	-1.7655	11.0363	3.8784
	48	H	2.2288	2.2288	4.9307		48	H	16.4218	-0.7312	5.0822			48	H	12.5721	-3.655	3.6213			48	H	0.8266	9.6248	5.0821
	49	H	-2.2288	-2.2288	4.9307		49	Si	20.2147	0.2266	-1.953			49	Si	16.898	1.1103	-1.2084			49	Si	0.4604	13.5202	-1.9527
	50	H	2.2288	4.9307	2.2288		50	H	19.2355	-2.5645	-3.1443			50	H	15.9929	-0.3631	-3.8878			50	H	3.068	12.1251	-3.1444
	51	H	4.9307	2.2288	2.2288		51	Si	17.42	2.0475	-3.8789			51	Si	14.2732	3.8638	-1.8171			51	Si	-1.7655	11.0363	-3.8784
	52	H	-4.9307	-2.2288	2.2288		52	H	16.4219	-0.7311	-5.0822			52	H	13.3533	2.407	-4.5005			52	H	0.8266	9.6248	-5.0821
	53	H	-2.2288	-4.9307	2.2288		53	H	20.5126	2.7295	0			53	H	17.0593	1.9333	1.8682			53	H	-1.9696	14.193	0
	54	H	-2.2288	4.9307	-2.2288		54	H	17.7057	4.5603	1.936			54	H	14.1226	2.3954	4.3465			54	H	-4.2052	11.7024	1.9345
	55	H	-4.9307	2.2288	-2.2288		55	H	17.7057	4.5603	-1.9359			55	H	14.42	4.7019	1.2564			55	H	-4.2052	11.7024	-1.9345
	56	H	4.9307	-2.2288	-2.2288		56	H	12.634	5.5359	0.0001			56	H	9.2237	4.5866	3.094			56	H	-5.9479	6.842	0
	57	H	2.2288	-4.9307	-2.2288		57	H	14.8692	6.4316	0.0001			57	H	11.4597	5.1863	3.7576			57	H	-6.488	9.1885	0
	58	H	-2.2288	2.2288	-4.9307		58	H	18.4603	-5.8623	1.204			58	H	14.8554	-5.5587	-2.4304			58	H	6.2115	10.8591	1.2041
	59	H	2.2288	-2.2288	-4.9307		59	H	18.4603	-5.8623	-1.2041			59	H	15.0426	-4.1255	-4.3567			59	H	6.2115	10.8591	-1.2041
	60	H	-0.8603	0.8603	6.3178		60	H	20.8758	-3.3993	0			60	H	17.3782	-2.9966	-1.7834			60	H	4.1445	13.6207	0
	61	H	0.8603	-0.8603	6.3178		61	Si	19.7177	1.495	3.8841			61	Si	15.9648	-1.3295	4.1842			61	Si	-0.8693	13.223	3.8836
	62	H	0.8603	6.3178	-0.8603		62	H	21.6663	-0.131	1.9412			62	H	18.0417	-1.5748	1.7664			62	H	1.0353	14.9002	1.9399
	63	H	-0.8603	6.3178	0.8603		63	H	17.0892	2.8509	5.0957			63	H	13.2613	-0.8291	5.814			63	H	-2.6099	10.8317	5.0952
	64	H	6.3178	-0.8603	0.8603		64	Si	19.7177	1.4951	-3.884			64	Si	16.5605	3.3044	-2.0189			64	Si	-0.8693	13.223	-3.8836
	65	H	6.3178	0.8603	-0.8603		65	H	21.6663	-0.1309	-1.9412			65	H	18.3421	0.7422	-1.3287			65	H	1.0353	14.9002	-1.9399
	66	H	-6.3178	0.8603	0.8603		66	H	17.0892	2.851	-5.0956			66	H	14.0433	5.2501	-2.3277			66	H	-2.6099	10.8317	-5.0952
	67	H	-6.3178	-0.8603	-0.8603		67	H	20.0515	0.7116	5.1089			67	H	16.1966	-2.7046	4.7138			67	H	-0.0451	13.4338	5.1088
	68	H	-0.8603	-6.3178	-0.8603		68	H	20.5417	2.7383	3.9037			68	H	16.7958	-0.3882	4.9895			68	H	-1.9729	14.2265	3.9022
	69	H	0.8603	-6.3178	0.8603		69	H	20.5417	2.7384	-3.9036			69	H	17.3921	4.2683	-1.2414			69	H	-1.9729	14.2265	-3.9022
	70	H	0.8603	0.8603	-6.3178		70	H	20.0515	0.7117	-5.1088			70	H	16.9823	3.392	-3.447			70	H	-0.0451	13.4338	-5.1088
	71	H	-0.8603	-0.8603	-6.3178		71	C	10.6501	-0.8746	0	Bridge		71	C	7.2016	-0.4387	-0.9052	Bridge		71	C	0.1269	3.8846	0	Bridge
							72	H	10.4253	0.1925	0	↓		72	H	6.9777	0.6075	-1.1205	↓		72	H	-0.9599	3.7947	0	↓
							73	C	9.6206	-1.7484	0			73	C	6.1811	-1.2581	-0.5743			73	C	0.8686	2.7563	0
							74	H	9.8437	-2.8165	0			74	H	6.4011	-2.3049	-0.3634			74	H	1.9559	2.8493	0
							75	C	8.1848	-1.444	0			75	C	4.7574	-0.9216	-0.4558			75	C	0.396	1.3667	0
							76	C	7.2642	-2.5087	0			76	C	3.8495	-1.9373	-0.1018			76	C	1.3461	0.3264	0
							77	C	7.6709	-0.132	0			77	C	4.243	0.3715	-0.6756			77	C	-0.964	1.0071	0
							78	C	5.8944	-2.2845	0			78	C	2.4913	-1.6839	0.0294			78	C	0.964	-1.0071	0
							79	H	7.6372	-3.5296	-0.0001			79	H	4.2234	-2.9426	0.0731			79	H	2.4034	0.5786	0
							80	C	6.3059	0.1033	0			80	C	2.889	0.6356	-0.5473			80	C	-1.3461	-0.3264	0
							81	H	8.3492	0.7152	0			81	H	4.9119	1.1811	-0.9491			81	H	-1.7295	1.7765	0
							82	C	5.3873	-0.9699	0			82	C	1.9834	-0.3883	-0.1912			82	C	-0.396	-1.3667	0
							83	H	5.2023	-3.1199	0			83	H	1.8088	-2.4815	0.3036			83	H	1.7295	-1.7765	0
							84	H	5.9277	1.1202	0			84	H	2.51	1.6375	-0.7196			84	H	-2.4034	-0.5786	0
							85	C	3.9876	-0.7251	0			85	C	0.5949	-0.1167	-0.058			85	C	-0.8686	-2.7563	0
							86	C	2.7892	-0.5092	0			86	C	-0.5948	0.1154	0.0569			86	H	-1.9559	-2.8493	0
							87	C	1.3913	-0.2548	0			87	C	-1.9833	0.3872	0.1901			87	C	-0.1269	-3.8846	0
							88	C	0.8997	1.0682	0			88	C	-2.491	1.6828	-0.0305			88	H	0.9599	-3.7947	0
							89	C	0.4639	-1.3185	0			89	C	-2.889	-0.6367	0.546			89	Si	-0.8563	-5.6256	0	Acceptor
							90	C	-0.4638	1.3174	0			90	C	-3.8493	1.9362	0.1006			90	Si	0.9073	-7.2233	0	↓
							91	H	1.6041	1.8932	0			91	H	-1.8086	2.4803	-0.3046			91	Si	-2.1807	-5.9603	1.943
							92	C	-0.8996	-1.0693	0			92	C	-4.2429	-0.3725	0.6743			92	Si	-2.1807	-5.9603	-1.943
							93	H	0.831	-2.3393	0			93	H	-2.51	-1.6387	0.7182			93	Si	0.0002	-9.4298	0
							94	C	-1.3912	0.2537	0			94	C	-4.7573	0.9206	0.4546			94	Si	2.2439	-6.9568	1.9486
							95	H	-0.8309	2.3383	0			95	H	-4.2231	2.9416	-0.0742			95	Si	2.2439	-6.9568	-1.9486
							96	H	-1.6041	-1.8943	0			96	H	-4.912	-1.1822	0.9477			96	Si	-3.0986	-8.1441	1.9174
							97	C	-2.7892	0.5081	0			97	C	-6.1809	1.2572	0.5732			97	Si	-0.869	-5.6551	3.8855
							98	C	-3.9875	0.7241	0			98	H	-6.4009	2.3039	0.3615			98	H	-3.2986	-4.9655	1.9376
							99	C	-5.3872	0.969	0			99	C	-7.2014	0.4381	0.9049			99	Si	-3.0986	-8.1441	-1.9174
							100	C	-6.3059	-0.1041	0			100	H	-6.9774	-0.608	1.1211			100	Si	-0.869	-5.6551	-3.8855
							101	C	-5.8942	2.2836	0			101	Si	-9.0058	0.945	1.0483	Acceptor		101	H	-3.2986	-4.9655	-1.9376
							102	C	-7.6709	0.1313	0			102	Si	-10.3358	-0.5822	-0.2131	↓		102	Si	-1.3405	-9.7413	1.9468
							103	H	-5.9278	-1.121	0			103	Si	-9.685	0.8101	3.3222			103	Si	-1.3405	-9.7413	-1.9468
							104	C	-7.264	2.508	0			104	Si	-9.3794	3.1355	0.2116			104	Si	1.7759	-11.0216	0
							105	H	-5.202	3.119	0			105	Si	-12.6459	-0.0235	-0.0137			105	Si	0.8955	-7.227	3.8783
							106	C	-8.1847	1.4433	0			106	Si	-10.0312	-2.7947	0.6036			106	Si	4.0246	-8.5186	1.926
							107	H	-8.3492	-0.7158	0			107	Si	-9.7249	-0.473	-2.5082			107	H	2.8142	-5.5735	1.9409
							108	H	-7.6368	3.5289	0			108	Si	-11.9724	1.3963	3.5141			108	Si	0.8955	-7.227	-3.8783
							109	C	-9.6205	1.7478	0			109	Si	-9.3453	-1.3772	4.1516			109	Si	4.0246	-8.5186	-1.926
							110	H	-9.8435	2.816	0			110	H	-8.8715	1.7763	4.1229			110	H	2.8142	-5.5735	-1.9409
							111	C	-10.65	0.8742	0			111	Si	-11.6733	3.6816	0.4524			111	Si	-4.4482	-8.4792	0
							112	H	-10.4254	-0.193	0			112	Si	-8.7776	3.2893	-2.0709			112	H	-3.9309	-8.3414	3.1441
							113	Si	-12.4721	1.3648	0	Acceptor		113	H	-8.5721	4.1149	1.0043			113	H	-0.3195	-4.2698	3.9289
							114	Si	-13.7896	-0.6168	0	↓		114	Si	-13.2989	-0.1362	2.2761			114	H	-1.7082	-5.8468	5.104
							115	Si	-13.002	2.6251	1.9423			115	Si	-12.9971	2.186	-0.8345			115	H	-3.9309	-8.3414	-3.1441
							116	Si	-13.002	2.625	-1.9423			116	Si	-13.9583	-1.5562	-1.2844			116	H	-1.7082	-5.8468	-5.104
							117	Si	-16.1063	-0.0571	0			117	Si	-10.6451	-2.8946	2.8901			117	H	-0.3195	-4.2698	-3.9289
							118	Si	-13.3174	-1.8949	1.9482			118	Si	-11.307	-4.3192	-0.6846			118	Si	-2.2294	-11.9451	1.9194
							119	Si	-13.3174	-1.895	-1.9482			119	H	-8.5822	-3.147	0.4768			119	Si	0.0242	-9.4302	3.8678
							120	Si	-15.301	3.1995	1.9167			120	Si	-10.0484	1.7322	-3.3123			120	Si	-2.2294	-11.9451	-1.9194
							121	Si	-12.5038	1.3779	3.8873			121	Si	-11.0108	-2.0196	-3.7601			121	Si	0.0242	-9.4302	-3.8678
							122	H	-12.1903	3.8823	1.9372			122	H	-8.2797	-0.8334	-2.6321			122	Si	0.8443	-13.2083	0
							123	Si	-15.3011	3.1995	-1.9168			123	Si	-12.3473	3.5957	2.7214			123	Si	3.0973	-10.6983	1.9485
							124	Si	-12.5038	1.3778	-3.8873			124	H	-12.3798	1.3169	4.9509			124	Si	3.0973	-10.6983	-1.9485
							125	H	-12.1903	3.8822	-1.9373			125	H	-7.9027	-1.7467	4.054			125	H	1.7457	-7.0463	5.095
							126	Si	-16.6149	1.2198	1.9474			126	H	-9.7296	-1.4486	5.5911			126	Si	5.3595	-8.213	0
							127	Si	-16.6149	1.2198	-1.9475			127	H	-11.8862	5.0663	-0.0706			127	H	4.8561	-8.3281	3.1539
							128	Si	-17.4064	-2.0564	0			128	H	-9.0536	4.6689	-2.5677			128	H	1.7457	-7.0463	-5.095
							129	Si	-13.7889	-0.6056	3.8791			129	H	-7.3196	3.0337	-2.2516			129	H	4.8561	-8.3281	-3.1539
							130	Si	-14.5871	-3.8947	1.9264			130	Si	-15.5987	0.4366	2.4476			130	Si	-5.3533	-10.6619	0
							131	H	-11.8627	-2.2449	1.938			131	Si	-12.9439	-2.3499	3.0636			131	H	-5.5534	-7.4721	0
							132	Si	-13.7889	-0.6057	-3.8791			132	Si	-15.3007	2.728	-0.6187			132	Si	-3.5883	-12.2329	0
							133	Si	-14.5871	-3.8948	-1.9263			133	Si	-12.3487	2.2641	-3.1198			133	Si	-0.4604	-13.5202	1.9527
							134	H	-11.8627	-2.245	-1.938			134	Si	-16.25	-0.9649	-1.0651			134	H	-3.068	-12.1251	3.1444
							135	Si	-15.8391	4.4824	-0.0001			135	Si	-13.595	-3.7509	-0.4497			135	Si	1.7655	-11.0363	3.8784
							136	H	-15.6212	3.9924	3.1437			136	Si	-13.2959	-1.427	-3.5628			136	H	-0.8266	-9.6248	5.0821
							137	H	-11.0511	1.046	3.935			137	H	-10.4335	-4.2874	3.3911			137	Si	-0.4604	-13.5202	-1.9527
							138	H	-12.8244	2.1799	5.1037			138	Si	-10.6626	-4.2142	-2.9558			138	H	-3.068	-12.1251	-3.1444
							139	H	-15.6212	3.9923	-3.1438			139	H	-11.0902	-5.7016	-0.1579			139	Si	1.7655	-11.0363	-3.8784
							140	H	-12.8244	2.1798	-5.1038			140	H	-9.655	1.7918	-4.7535			140	H	-0.8266	-9.6248	-5.0821
							141	H	-11.0511	1.0459	-3.9351			141	H	-10.6092	-1.9392	-5.1981			141	H	1.9696	-14.193	0
							142	Si	-18.9281	1.7632	1.9201			142	Si	-14.6309	4.1691	2.9236			142	H	4.2052	-11.7024	1.9345
							143	Si	-16.0991	-0.0805	3.8686			143	H	-11.5126	4.5503	3.5135			143	H	4.2052	-11.7024	-1.9345
							144	Si	-18.9281	1.7632	-1.9201			144	Si	-15.9288	2.648	1.6642			144	H	5.9479	-6.842	0
							145	Si	-16.0991	-0.0806	-3.8686			145	Si	-16.898	-1.1095	1.209			145	H	6.488	-9.1885	0
							146	Si	-19.709	-1.468	0			146	H	-15.9924	0.3637	3.8883			146	H	-6.2115	-10.8591	1.2041
							147	Si	-16.8831	-3.3116	1.9489			147	Si	-14.2736	-3.8635	1.8175			147	H	-6.2115	-10.8591	-1.2041
							148	Si	-16.8831	-3.3116	-1.9488			148	H	-13.3532	-2.4067	4.5007			148	H	-4.1445	-13.6207	0
							149	H	-13.4807	-1.4197	5.0947			149	Si	-16.5963	1.2214	-1.909			149	Si	0.8693	-13.223	3.8836
							150	Si	-14.08	-5.1662	0.0001			150	H	-15.5056	4.1164	-1.1348			150	H	-1.0353	-14.9002	1.9399
							151	H	-14.272	-4.6878	3.1541			151	Si	-13.6795	0.7632	-4.3797			151	H	2.6099	-10.8317	5.0952
							152	H	-13.4807	-1.4198	-5.0947			152	H	-12.572	3.655	-3.6212			152	Si	0.8693	-13.223	-3.8836
							153	H	-14.272	-4.6879	-3.154			153	H	-17.0599	-1.9325	-1.8675			153	H	-1.0353	-14.9002	-1.9399
							154	Si	-18.1344	5.0444	-0.0001			154	H	-14.4209	-4.7015	-1.256			154	H	2.6099	-10.8317	-5.0952
							155	H	-15.0125	5.7285	-0.0001			155	H	-14.1234	-2.3952	-4.3462			155	H	0.0451	-13.4338	5.1088
							156	Si	-19.4193	3.0609	0			156	H	-9.2248	-4.5871	-3.0942			156	H	1.9729	-14.2265	3.9022
							157	Si	-20.2147	-0.226	1.9531			157	H	-11.4609	-5.1864	-3.7576			157	H	1.9729	-14.2265	-3.9022
							158	H	-19.2352	2.5651	3.1443			158	H	-15.0415	4.1261	4.357			158	H	0.0451	-13.4338	-5.1088
							159	Si	-17.4202	-2.0471	3.879			159	H	-14.8542	5.5592	2.4306
							160	H	-16.4218	0.7314	5.0822			160	H	-17.3776	2.9975	1.784
							161	Si	-20.2147	-0.2261	-1.953			161	Si	-16.5608	-3.3036	2.0195
							162	H	-19.2352	2.565	-3.1443			162	H	-18.342	-0.7412	1.3295
							163	Si	-17.4202	-2.0472	-3.8789			163	H	-14.0439	-5.2498	2.328
							164	H	-16.4218	0.7313	-5.0822			164	Si	-15.9651	1.3301	-4.1837
							165	H	-20.5129	-2.7289	0			165	H	-18.0417	1.5757	-1.7657
							166	H	-17.7062	-4.56	1.936			166	H	-13.2619	0.8292	-5.8138
							167	H	-17.7062	-4.56	-1.9359			167	H	-16.9825	-3.3912	3.4476
							168	H	-12.6347	-5.5362	0.0001			168	H	-17.3927	-4.2674	1.2421
							169	H	-14.8699	-6.4316	0.0001			169	H	-16.7963	0.3889	-4.9889
							170	H	-18.4596	5.8627	1.204			170	H	-16.1967	2.7052	-4.7133
							171	H	-18.4597	5.8627	-1.2041
							172	H	-20.8754	3.3999	0
							173	Si	-19.7179	-1.4944	3.8841
							174	H	-21.6663	0.1317	1.9412
							175	H	-17.0895	-2.8506	5.0957
							176	Si	-19.7179	-1.4945	-3.884
							177	H	-21.6663	0.1317	-1.9412
							178	H	-17.0895	-2.8508	-5.0956
							179	H	-20.0516	-0.711	5.1089
							180	H	-20.542	-2.7377	3.9037
							181	H	-20.542	-2.7378	-3.9036
							182	H	-20.0516	-0.7112	-5.1088
